# Supplementary material for: Quantitative Fitness Analysis Identifies exo1∆ and Other Suppressors or Enhancers of Telomere Defects in Schizosaccharomyces pombe
Source: PLOS journal article supplement (doi:10.1371/journal.pone.0132240), 2015-07-13
Supplement: S7 (10.1371/journal.pone.0132240.s007) [file journal.pone.0132240.s007]

# Supplementary Information

To allow plots and statistical analysis presented in this paper to be reproduced, we have included three types of file, tabulating fitnesses, fitness summaries and estimates of genetic interaction strength. The contents of each of these files are described briefly below. For more information, including how to generate each file type in your own experiment and how to convert from one file type to another, please see the documentation for the QFA R package (<http://qfa.r-forge.r-project.org/>).

Supplementary filenames include screen IDs (e.g. QFA0068) indicating specific experiments as follows:

| Screen ID | Query strain           | Temp. (°C) | Selection media | SGA method           | Experiment scale | Pinning format |
|-----------|------------------------|------------|-----------------|----------------------|------------------|----------------|
| SGA0004   | <i>his3Δ</i>           | 30         | YE5S_CGN        | <i>Cycloheximide</i> | Large scale      | 768            |
| SGA0015   | <i>his3Δ</i>           | 30         | YE5S_CGN        | <i>Cycloheximide</i> | Large scale      | 768            |
| SGA0018   | <i>his3Δ</i>           | 30         | YE5S_GN         | <i>Heat-shock</i>    | Large scale      | 768            |
| SGA0049   | <i>his3Δ</i>           | 30         | YE5S_GN         | <i>Heat-shock</i>    | Large scale      | 768            |
| SGA0050   | <i>his7Δ</i>           | 30         | YE5S_CGN        | <i>Cycloheximide</i> | Large scale      | 768            |
| SGA0056   | <i>ura5Δ</i>           | 30         | YE5S_CGN        | <i>Cycloheximide</i> | Large scale      | 768            |
| SGA0058   | <i>his7Δ</i>           | 30         | YE5S_GN         | <i>Heat-shock</i>    | Large scale      | 768            |
| SGA0059   | <i>ura5Δ</i>           | 30         | YE5S_GN         | <i>Heat-shock</i>    | Large scale      | 768            |
| SGA0065   | <i>his3Δ</i>           | 30         | YE5S_CGN        | <i>Cycloheximide</i> | Small scale      | 768            |
| SGA0067   | <i>his3Δ</i>           | 30         | YE5S_GN         | <i>Heat-shock</i>    | Small scale      | 768            |
| QFA0068   | <i>his3Δ</i>           | 20         | YE5S_GN         | <i>Heat-shock</i>    | Small scale      | 384            |
| QFA0069   | <i>taz1Δ</i>           | 20         | YE5S_GN         | <i>Heat-shock</i>    | Small scale      | 384            |
| QFA0088   | <i>pot<sup>+</sup></i> | 37         | YE5S_GH         | <i>Heat-shock</i>    | Large scale      | 384            |
| QFA0089   | <i>pot1-1</i>          | 37         | YE5S_GH         | <i>Heat-shock</i>    | Large scale      | 384            |

*Media key:* C: Cycloheximide, G: Geneticin (G418), N: Nourseothricin (clonNAT), H: Hygromycin, YE5S: Yeast extract 5 supplements

## Individual Fitness (Fit.txt) files

Contain experimental metadata and a selection of different measures of fitness and parameter values for a population model (generalised logistic model) summarising growth curves for each spot on each plate of an experiment. Columns can be interpreted as follows:

*Barcode* - Unique plate identifier

*Row* - Row number (counting from top of image) of culture in rectangular gridded array

*Col* - Column number (counting from left of image) of culture in rectangular gridded array

*ScreenID* - Unique identifier for this QFA screen

*Treatment* - Conditions applied externally to plates (e.g. temperature(s) at which cultures were grown, UV irradiation applied, etc.)

*Medium* - Nutrients/drugs in plate agar

*ORF* - Systematic, unique identifier for genotype in this position in arrayed library

*Screen.Name* - Name of screen (identifies biological repeats, and experiment)

*Library.Name* - Name of library, specifying particular culture location

*MasterPlate Number* - Library plate identifier

*Timeseries order* - Sequential photograph number

*Inoc.Time* - User specified date and time of inoculation (specified in ExptDescription.txt file)

*TileX* - Culture tile width (pixels)

*TileY* - Culture tile height (pixels)

*XOffset* - x-coordinate of top left corner of rectangular tile bounding culture (number of pixels from left of image)

*YOffset* - y-coordinate of top left corner of rectangular tile bounding culture (number of pixels from top of image)

*Threshold* - Global pixel intensity threshold used for image segmentation (after lighting correction)

*EdgeLength* - Number of culture pixels classified as being microcolony edge pixels (useful for classifying contaminants in cultures grown from dilute inoculum)

*EdgePixels* - Number of pixels classified as culture on edge of square tile

*RepQuad* - Integer identifying which of the quadrants of a 1536 plate were used to inoculate the current 384 plate (set equal to 1 for all cultures for 1536 format for example)

*K* - Generalised logistic model carrying capacity

*r* - Generalised logistic model rate parameter

*g* - Generalised logistic model inoculum density (referred to in vignette as \$g\_0\$)

*v* - Generalised logistic model shape parameter (set to 1 to recover logistic model)

*objval* - Objective function value at selected optimum

*tshift* - Shift applied to observation times before fitting logistic model (need to apply same shift before overlaying curve on expt. obs.). Default is zero (expt. starts at inoculation time specified in experimental description file), but if *qfa.fit* function is called with *inocguess=NULL*, then the start of experiment is redefined as the time of the first reliable density observation.

*t0* - Time of first detectable cell density observation (i.e. above *detectThresh*)

*d0* - Normalised cell density of first observation (be careful about condensation on plates when using this). Note this is not necessarily the density at *t0*.

*nAUC* - Numerical Area Under Curve. This is a model-free fitness estimate.

*nSTP* - Single Time Point fitness. Cell density at time STP, as estimated with approximating function. This is a model-free fitness estimate.

*nr* - Numerical estimate of intrinsic growth rate. Growth rate estimated by fitting smoothing function to log of data, calculating numerical slope estimate across range of data and selecting the maximum estimate (should occur during exponential phase).

*nr\_t* - Time at which maximum slope of log observations occurs

*maxslp* - Numerical estimate of maximum slope of growth curve. Slope estimated by fitting smoothing function to untransformed data and calculating numerical slope estimate of smoothed version of data and selecting the maximum estimate (should occur approximately half way through growth). This fitness measure will be affected by both rate of growth and final colony size. Final colony size is expected to be strongly affected by competition between cultures.

*maxslp\_t* - Time at which maximum slope of observations occurs

*Client* - Client for whom screen was carried out

*ExptDate* - A representative/approximate date for the experiment (note that genome-wide QFA screens typically take weeks to complete)

*User* - Person who actually carried out screen

*PI* - Principal investigator leading project that screen is part of

*Condition* - The most important defining characteristic of screen, as specified by user (e.g. the temperature screen was carried out at if screen is part of multi-temperature set of screens, or the query mutation if part of a set of screens comparing query mutations, or the drugs present in the medium if part of a set of drug screens)

*Inoc* - Qualitative identifier of inoculation type (e.g. "DIL" for dilute inoculum, "CONC" for concentrated). Used to distinguish between experiments carried out with different methods of inoculation.

*Gene* - Identifier for genotype at a particular location on an agar plate. Typically prefer unambiguous, systematic gene names here.

*TrtMed* - Combination of treatment and medium identifiers, specifying the environment in which the cells have grown

*MDP* - Maximum Doubling Potential: number of doublings in cell density observed from inoculum to carrying capacity, derived from logistic model parameters

*MDR* - Maximum Doubling Rate: intrinsic growth rate at  $t=0$ , derived from logistic model parameters  
*MDRMDP* - Product of MRD and MDP

*glog\_maxslp* - maxslp derived from logistic model parameters

*DT* - Doubling time at  $t=0$ , derived from logistic model parameters

*AUC* - Area Under growth Curve up to AUCLim, derived from logistic model parameters

*Fit* - Copy of one of the fitness columns (typically MDRMDP) for further analysis

## **Genetic Interaction Strength (GIS.txt) files**

Contain the evidence for genetic interaction strength estimates and estimates of the statistical significance of GIS. Also contain fitness summaries for both query and control experiment. Plotting QueryFitnessSummary (y-axis) against ControlFitnessSummary (x-axis) and fitting a linear regression, forced through the origin, to the resultant points, produces a fitness plot.

*R package version* - Version of software used for analysis

*Summary type* - Statistic used to summarise fitness replicates (e.g. mean or median)

*Test type* - Statistical test used to classify deviations of observed from predicted fitness as significant (e.g. t-test or Wilcoxon test)

*x/y-axis treatment* - Conditions experienced by plate (e.g. Temperature or UV irradiation)

*x/y -axis medium* - Contents of agar substrate *x/y -axis screen ID*: QFA0068

*x/y -axis screen name* - Experiment tag, typically more human-readable than Screen ID

*x/y -axis libraries* - Identifier for libraries used in this experiment (e.g. yeast knock-out collection)

*x/y -axis client* - Person who commissioned experiment

*x/y -axis user* - Person who carried out experiment

*x/y -axis date* - Approximate date experiment carried out

*x/y -axis PI* - Principal Investigator in charge of experiment

*x/y -axis condition* - Specification of the main factor (e.g. treatment, medium or genotype) for an experiment

*x/y -axis inoculation type* - Label indicating how cells were inoculated (e.g. CONC, DIL)

*x/y -axis fitness definition* - Which measure of fitness is summarised and used to calculate GIS

*ORF* - Unique strain genotype identifier (e.g. Y-number for yeast strains)

*Gene* - Human readable genotype identifier

*P* - p-value for significance of difference between control and query strain fitnesses

*Q* - q-value for significance of difference between control and query strain fitnesses. This is FDR corrected p-value

*GIS* - Genetic interaction strength. Deviation of (mean or median, depending on value of *wctest*) observed query strain fitness from expected fitness given control query strain fitness and a multiplicative model of genetic interaction.

*QueryFitnessSummary* - Summary statistic for all available replicate observations of query strain fitness (mean or median, depending on value of *wctest*).

*ControlFitnessSummary* - Summary statistic for all available replicate observations of control strain fitness (mean or median, depending on value of *wctest*).

*QuerySE* - Standard error on mean of query strain fitness observations

*ControlSE* - Standard error on mean of control strain fitness observations

*TestType* - Type of statistical test for significant difference carried out (i.e. Wilcoxon or t-test)

*Type* - Type of genetic interaction observed (suppressor, enhancer, positive, negative). This is assigned for strains with  $\text{abs}(\text{GIS}) > \text{GIS}_{\text{thresh}}$  and by comparing q-value with  $q_{\text{thresh}}$ .

## **Fitness Report (FitnessReport) files**

Similar to the GIS.txt files above, but only contain fitness summaries for an individual experiment. Individually, these files do not contain evidence for genetic interaction.

*R package version* - Version of software used for analysis

*Treatment* - Conditions experienced by plate (e.g. Temperature or UV irradiation)

*Medium* - Contents of agar substrate

*Screen ID* - Systematic experiment identifier (uniquely identifies one set of plates)

*Screen name* - Experiment tag, typically more human-readable than Screen ID

*Libraries* - Identifier for libraries used in this experiment (e.g. yeast knock-out collection)

*Client* - Person who commissioned experiment

*User* - Person who carried out experiment

*PI* - Principal Investigator in charge of experiment

*Date* - Approximate date experiment carried out

*Fitness definition* - Which measure of fitness is summarised

*Condition* - Specification of the main factor (e.g. treatment, medium or genotype) for an experiment

*Gene* - Standard gene name

*ORF* - Systematic gene name

*MedianFit* - Median fitness summary of all available replicates for gene

*MeanFit* - Mean fitness summary of all available replicates for gene

*VarianceFit* - Variance of fitness replicates for gene

*NumRepeats* - Number of replicate fitnesses available for gene

*SEFit* - Standard error of fitness replicates for gene
